# Supplementary material
Source: PubMed Central journal article supplement (PMC5841451)
Supplement: NIHMS938267-supplement-Supplementary_Material.pdf [file NIHMS938267-supplement-Supplementary_Material.pdf]

Supplementary material for “Industrial hog farming is associated with altered circulating immunologic markers”

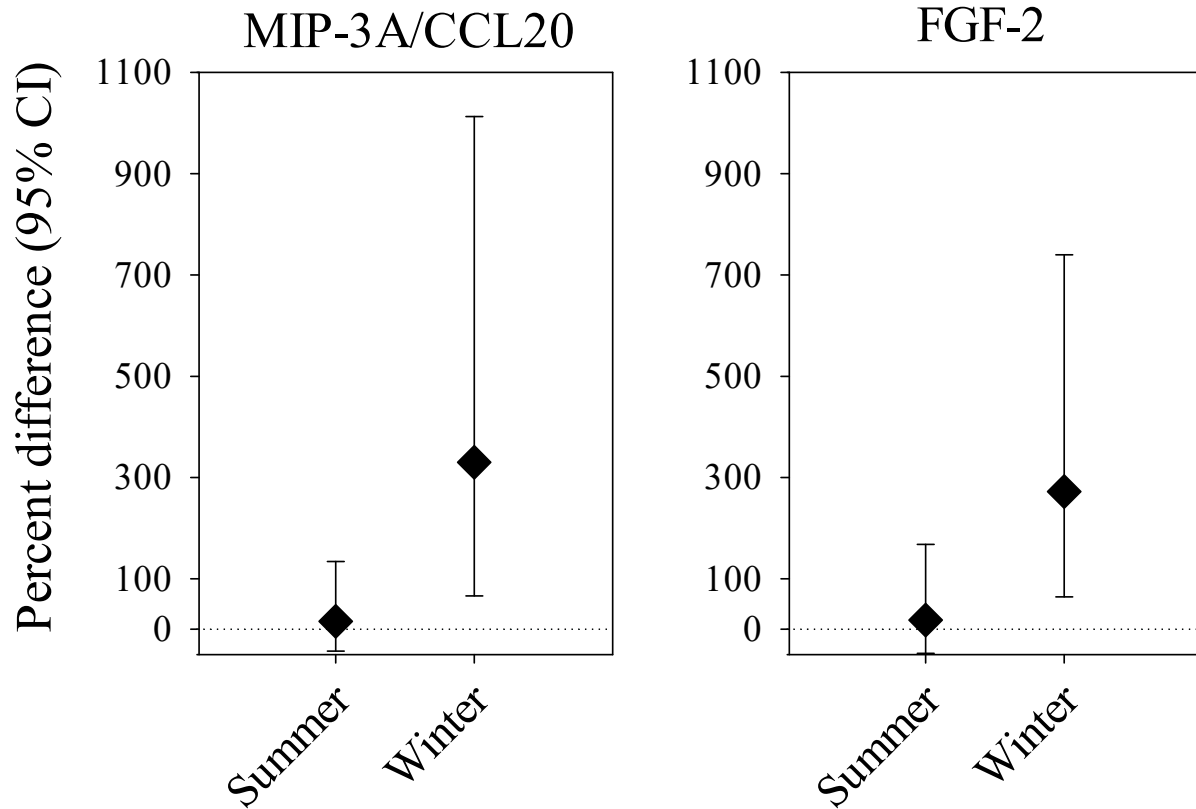

Supplementary Figure 1. Differences in natural log-transformed marker levels between hog farmers and controls, stratified by season ( $P_{\text{interaction}} = 0.02$  and  $0.07$  for MIP-3A/CCL20 and FGF-2, respectively).

**Supplementary Table 1. Percent detection and reproducibility of 58 immune markers**

| <b>Marker</b>      | <b>Percent detection</b> | <b>Overall CV</b> |
|--------------------|--------------------------|-------------------|
| 6Ckine/CCL21       | 91.8                     | 8.75              |
| BCA-1/CXCL13       | 100                      | 4.26              |
| CRP                | 100                      | 1.16              |
| CTACK              | 100                      | 2.91              |
| EGF                | 100                      | 1.89              |
| ENA-78/CXCL5       | 100                      | 1.28              |
| EOTAXIN/CCL11      | 100                      | 6.03              |
| EOTAXIN-2/CCL24    | 100                      | 1.02              |
| FGF-2              | 66.4                     | 10.44             |
| Fractalkine/CX3CL1 | 79.5                     | 5.29              |
| G-CSF              | 70.5                     | 5.47              |
| GCP-2/CXCL6        | 100                      | 2.61              |
| GM-CSF             | 92.6                     | 2.75              |
| GRO/CXCL1,2,3      | 100                      | 1.92              |
| I-TAC/CXCL11       | 100                      | 2.56              |
| IL-1B              | 95.1                     | 5.02              |
| IL-1RA             | 73.8                     | 6.78              |
| IL-5               | 84.4                     | 5.33              |
| IL-6               | 100                      | 2.31              |
| IL-7               | 91.0                     | 3.50              |
| IL-8               | 100                      | 1.74              |
| IL-10              | 94.3                     | 4.35              |
| IL-12(p70)         | 86.9                     | 3.81              |
| IL-13              | 90.2                     | 3.03              |
| IL-16              | 94.3                     | 3.32              |
| IL-17A             | 91.0                     | 4.01              |
| IL-21              | 68.0                     | 10.16             |
| IL-23              | 93.4                     | 2.22              |
| IP-10/CXCL10       | 100                      | 3.09              |
| MCP-1/CCL2         | 100                      | 2.76              |
| MCP-2/CCL8         | 94.3                     | 3.08              |
| MCP-4/CCL13        | 91.8                     | 8.89              |
| MDC/CCL22          | 100                      | 3.53              |
| MIG/CXCL9          | 100                      | 2.19              |
| MIP-1A/CCL3        | 99.2                     | 2.91              |
| MIP-1B/CCL4        | 93.4                     | 4.19              |
| MIP-1D/CCL15       | 100                      | 2.62              |
| MIP-3A/CCL20       | 86.1                     | 4.24              |
| MIP-3B/CCL19       | 100                      | 2.13              |
| SAA                | 100                      | 1.78              |
| SAP                | 100                      | 4.21              |

| <b>Marker</b> | <b>Percent detection</b> | <b>Overall CV</b> |
|---------------|--------------------------|-------------------|
| SCF           | 89.3                     | 3.94              |
| SDF-1A+B      | 100                      | 2.85              |
| sEGFR         | 100                      | 8.00              |
| sGP-130       | 100                      | 5.29              |
| sILRII        | 100                      | 5.04              |
| sIL-4R        | 99.2                     | 5.84              |
| sIL-6R        | 100                      | 4.58              |
| sTNFR1        | 100                      | 4.22              |
| sTNFR2        | 100                      | 2.44              |
| sVEGFR2       | 100                      | 7.03              |
| sVEGFR3       | 99.2                     | 5.03              |
| TARC/CCL17    | 100                      | 0.95              |
| TGF-A         | 81.1                     | 4.52              |
| TNF-A         | 100                      | 4.31              |
| TPO           | 97.5                     | 1.59              |
| TRAIL         | 100                      | 2.43              |
| VEGF          | 95.1                     | 5.76              |

Notes: CV, coefficient of variation

**Supplementary Table 2. Comparison of results from linear and Tobit regression models for selected markers<sup>a</sup>**

| <b>Marker</b> | <b>Linear regression</b> |                | <b>Tobit regression</b> |                |
|---------------|--------------------------|----------------|-------------------------|----------------|
|               | <b>Beta (SE)</b>         | <b>P-value</b> | <b>Beta (SE)</b>        | <b>P-value</b> |
| MIP-3A/CCL20  | 0.746 (0.288)            | 0.011          | 0.740 (0.279)           | 0.009          |
| FGF-2         | 0.658 (0.285)            | 0.023          | 0.796 (0.335)           | 0.019          |
| sIL-4R        | 0.114 (0.054)            | 0.038          | 0.103 (0.047)           | 0.031          |

<sup>a</sup> Beta coefficients (standard errors) comparing natural log-transformed analyte levels between hog farmers and controls, based on regression models adjusted for age, season of phlebotomy, BMI, recent history of respiratory infection, recent NSAID use, and raising cattle.

**Supplementary Table 3. Comparisons of other immune markers among hog farmers and controls**

| Marker             | Bivariate analyses <sup>a</sup> |                           |         | Multivariate analyses <sup>b</sup> |         |
|--------------------|---------------------------------|---------------------------|---------|------------------------------------|---------|
|                    | Hog farmers,<br>median (IQR)    | Controls,<br>median (IQR) | P-value | Beta (SE)                          | P-value |
| 6Ckine/CCL21       | 291.9 (192.4-370.1)             | 247.0 (173.6-416.4)       | 0.53    | 0.015 (0.165)                      | 0.93    |
| BCA-1/CXCL13       | 24.2 (18.8-28.2)                | 27.3 (19.2-37.0)          | 0.10    | -0.126 (0.103)                     | 0.23    |
| CRP <sup>c</sup>   | 14368.0 (8647.7-22638.0)        | 14630.0 (8431.9-34438.0)  | 0.46    | -0.073 (0.153)                     | 0.64    |
| CTACK              | 673.3 (562.6-741.3)             | 658.9 (549.7-859.7)       | 0.56    | -0.062 (0.053)                     | 0.25    |
| EGF                | 416.1 (320.4-474.7)             | 402.0 (286.1-469.6)       | 0.77    | 0.021 (0.081)                      | 0.79    |
| ENA-78/CXCL5       | 958.1 (703.8-1283.6)            | 901.3 (691.0-1259.3)      | 0.64    | 0.112 (0.093)                      | 0.23    |
| EOTAXIN/CCL11      | 139.9 (108.9-171.9)             | 147.3 (116.5-169.4)       | 0.73    | -0.009 (0.076)                     | 0.91    |
| EOTAXIN-2/CCL24    | 790.5 (493.9-1398.5)            | 770.4 (505.1-1291.9)      | 0.84    | 0.035 (0.132)                      | 0.79    |
| Fractalkine/CX3CL1 | 84.5 (45.3-114.6)               | 69.3 (4.6-102.0)          | 0.10    | 0.357 (0.240)                      | 0.14    |
| G-CSF              | 30.4 (8.0-69.6)                 | 26.0 (8.0-45.1)           | 0.21    | 0.197 (0.211)                      | 0.35    |
| GCP-2/CXCL6        | 101.5 (82.9-140.7)              | 108.7 (82.3-154.2)        | 0.71    | -0.026 (0.085)                     | 0.76    |
| GM-CSF             | 51.6 (26.7-92.0)                | 44.1 (21.3-72.6)          | 0.30    | 0.094 (0.312)                      | 0.77    |
| GRO/CXCL1,2,3      | 720.5 (575.7-959.9)             | 759.6 (633.9-982.6)       | 0.76    | -0.017 (0.073)                     | 0.81    |
| I-TAC/CXCL11       | 58.5 (42.6-84.5)                | 63.0 (48.2-87.0)          | 0.40    | -0.098 (0.113)                     | 0.39    |
| IL-1B              | 1.7 (0.7-3.0)                   | 1.7 (1.0-3.6)             | 0.50    | -0.221 (0.201)                     | 0.27    |
| IL-1RA             | 68.6 (19.5-190.4)               | 54.2 (8.0-121.2)          | 0.25    | 0.122 (0.300)                      | 0.69    |
| IL-5               | 1.9 (0.7-3.0)                   | 1.6 (0.8-2.5)             | 0.25    | 0.002 (0.225)                      | 0.99    |
| IL-6               | 2.0 (1.0-3.0)                   | 2.0 (1.3-3.0)             | 0.79    | 0.042 (0.132)                      | 0.75    |
| IL-7               | 4.7 (3.2-5.9)                   | 4.6 (2.6-5.8)             | 0.97    | 0.005 (0.230)                      | 0.98    |
| IL-8               | 4.8 (3.6-6.0)                   | 4.7 (3.7-6.5)             | 0.66    | -0.031 (0.076)                     | 0.68    |
| IL-10              | 6.1 (3.0-13.0)                  | 7.0 (3.3-12.2)            | 0.68    | -0.094 (0.209)                     | 0.65    |
| IL-12(p70)         | 2.9 (1.8-4.3)                   | 2.9 (1.6-4.1)             | 0.74    | 0.141 (0.250)                      | 0.57    |
| IL-13              | 4.7 (2.4-8.6)                   | 5.0 (2.0-8.8)             | 0.76    | 0.046 (0.293)                      | 0.88    |
| IL-16              | 53.2 (29.8-89.0)                | 46.6 (30.6-89.3)          | 0.69    | -0.027 (0.188)                     | 0.89    |
| IL-17A             | 6.3 (3.5-11.0)                  | 5.4 (2.1-8.0)             | 0.13    | 0.144 (0.254)                      | 0.57    |
| IL-21              | 1.1 (0.1-2.6)                   | 1.4 (0.1-2.5)             | 0.63    | -0.384 (0.315)                     | 0.23    |
| IL-23              | 122.5 (75.7-210.0)              | 115.2 (59.8-244.7)        | 0.59    | 0.049 (0.247)                      | 0.84    |
| IP-10/CXCL10       | 479.0 (336.8-677.6)             | 541.9 (437.5-704.5)       | 0.12    | -0.059 (0.086)                     | 0.49    |

| Marker               | Bivariate analyses <sup>a</sup> |                           |         | Multivariate analyses <sup>b</sup> |         |
|----------------------|---------------------------------|---------------------------|---------|------------------------------------|---------|
|                      | Hog farmers,<br>median (IQR)    | Controls,<br>median (IQR) | P-value | Beta (SE)                          | P-value |
| MCP-1/CCL2           | 808.7 (679.0-965.9)             | 766.0 (658.0-967.0)       | 0.68    | 0.054 (0.066)                      | 0.41    |
| MCP-2/CCL8           | 37.1 (30.8-53.2)                | 42.6 (36.7-53.8)          | 0.11    | -0.203 (0.140)                     | 0.15    |
| MCP-4/CCL13          | 100.5 (74.4-138.6)              | 111.2 (64.0-144.6)        | 0.67    | -0.021 (0.123)                     | 0.87    |
| MIG/CXCL9            | 816.8 (579.0-1103.9)            | 860.2 (633.0-1337.3)      | 0.37    | -0.063 (0.116)                     | 0.59    |
| MIP-1A/CCL3          | 15.7 (12.0-19.1)                | 15.4 (10.9-19.9)          | 0.94    | 0.102 (0.126)                      | 0.42    |
| MIP-1B/CCL4          | 51.9 (36.5-67.6)                | 46.2 (30.5-56.5)          | 0.08    | 0.212 (0.120)                      | 0.08    |
| MIP-1D/CCL15         | 2006.4 (1497.9-2390.1)          | 2043.7 (1647.6-2873.3)    | 0.14    | -0.149 (0.087)                     | 0.09    |
| MIP-3B/CCL19         | 108.8 (80.7-142.4)              | 118.5 (91.8-161.8)        | 0.11    | -0.117 (0.082)                     | 0.16    |
| SAA <sup>c</sup>     | 5755.0 (4328.2-10049.0)         | 6643.7 (2671.5-12135.0)   | 0.96    | 0.039 (0.173)                      | 0.82    |
| SAP <sup>c</sup>     | 61715.0 (54722.0-72896.0)       | 65990.0 (54339.0-76917.0) | 0.27    | 0.007 (0.044)                      | 0.87    |
| SCF                  | 19.7 (5.8-31.5)                 | 18.7 (10.0-25.2)          | 0.53    | -0.406 (0.244)                     | 0.10    |
| SDF-1A+B             | 2263.1 (1965.7-2714.4)          | 2157.1 (1811.3-2753.7)    | 0.65    | 0.045 (0.065)                      | 0.49    |
| sEGFR <sup>c</sup>   | 100.3 (90.4-115.0)              | 97.3 (91.7-109.5)         | 0.60    | 0.011 (0.030)                      | 0.71    |
| sGP-130 <sup>c</sup> | 250.5 (231.7-282.4)             | 257.3 (231.7-290.9)       | 0.51    | -0.021 (0.038)                     | 0.58    |
| sILRII               | 8612.9 (7214.6-10547.0)         | 8208.8 (6881.5-10079.0)   | 0.31    | 0.090 (0.072)                      | 0.22    |
| sIL-6R <sup>c</sup>  | 38.9 (30.5-45.4)                | 37.9 (31.4-44.3)          | 0.71    | 0.025 (0.052)                      | 0.64    |
| sTNFR1               | 2175.2 (1880.2-2480.0)          | 2255.5 (1903.2-2574.2)    | 0.53    | 0.002 (0.049)                      | 0.96    |
| sTNFR2               | 8510.0 (7227.3-9877.7)          | 8308.3 (6819.2-10493.5)   | 0.75    | 0.042 (0.071)                      | 0.55    |
| sVEGFR2 <sup>c</sup> | 21.9 (19.0-25.4)                | 23.3 (21.1-26.1)          | 0.16    | -0.060 (0.037)                     | 0.10    |
| sVEGFR3              | 3227.7 (2257.1-5511.0)          | 3919.7 (2905.0-4909.2)    | 0.34    | -0.082 (0.108)                     | 0.45    |
| TARC/CCL17           | 76.2 (54.5-122.7)               | 96.5 (61.2-131.2)         | 0.20    | -0.098 (0.114)                     | 0.39    |
| TGF-A                | 1.9 (0.9-4.3)                   | 1.7 (1.0-3.9)             | 0.76    | -0.133 (0.231)                     | 0.57    |
| TNF-A                | 14.1 (11.0-17.9)                | 15.0 (11.0-18.1)          | 0.77    | -0.057 (0.079)                     | 0.47    |
| TPO                  | 179.8 (98.5-402.2)              | 227.1 (110.0-374.0)       | 0.53    | -0.249 (0.256)                     | 0.33    |
| TRAIL                | 32.8 (25.4-45.0)                | 41.6 (30.1-52.9)          | 0.04    | -0.139 (0.091)                     | 0.13    |
| VEGF                 | 238.6 (123.7-438.7)             | 221.1 (132.5-326.7)       | 0.50    | 0.028 (0.207)                      | 0.89    |

<sup>a</sup> Levels of immune markers are expressed as pg/mL unless otherwise noted.

<sup>b</sup> Beta coefficient (standard error) comparing natural log-transformed analyte levels between hog farmers and controls, based on multivariate linear regression models adjusted for age, season of phlebotomy, BMI, recent history of respiratory infection, recent NSAID use, and raising cattle.

<sup>c</sup> Levels of immune markers are expressed as ng/mL.
